# Supplementary material for: Preparation of water-dispersible silver-decorated polymer vesicles and micelles with excellent antibacterial efficacy
Source: Royal Society of Chemistry journal article supplement (doi:10.1039/c2py20181j), 2012-01-01

**Electronic Supplementary Information (ESI) for**

**Preparation of water-dispersible silver-decorated**

**polymer vesicles and micelles with excellent**

**antibacterial efficacy**

**Hang Lu<sup>a</sup>, Lang Fan<sup>a</sup>, Qiuming Liu<sup>a</sup>, Jingren Wei<sup>a</sup>, Tianbin Ren<sup>a</sup>,  
and Jianzhong Du<sup>\*a,b</sup>**

*<sup>a</sup>School of Materials Science and Engineering, Key Laboratory of Advanced Civil Engineering Materials of Ministry of Education, Tongji University, 4800 Caoan Road, Shanghai, 201804, China.*

*<sup>b</sup>State Key Laboratory of Molecular Engineering of Polymers, Fudan University.*

### Determination of the block copolymer composition:

In the  $^1\text{H}$  NMR spectra (Fig. 1), peak c and peak f belong to PDMA, peak g+i and peak h belong to PtBA. The degrees of polymerization were calculated according to the following procedures.

In Table S1,  $a_a$ ,  $a_b$ ,  $a_c$ ,  $a_{c-i}$  and  $a_{c-j}$  are the area of the peaks a, b, c, c+d+f+g+i+e+h and c+d+j+h+f+g+i+e in Fig. 1. x, y and z are the degrees of polymerization of PMDA, PtBA and PAA, respectively. B represents the copolymer  $\text{PEO}_{43}\text{-}b\text{-P(DMA}_x\text{-stat-}t\text{BA}_y)$  (polymer 1). C corresponds to  $\text{PEO}_{43}\text{-}b\text{-P(DMA}_x\text{-stat-}t\text{BA}_y\text{-stat-AA}_z)$  (polymer 2).

Table S1. The integrals of different peaks and the degrees of polymerization of  $\text{PEO}_{43}\text{-}b\text{-P(DMA}_x\text{-stat-}t\text{BA}_y)$  (polymer 1) and  $\text{PEO}_{43}\text{-}b\text{-P(DMA}_x\text{-stat-}t\text{BA}_y\text{-stat-AA}_z)$  (polymer 2).

| Spectrum | Polymer | Solvent                | $a_a$ | $a_b$ | $a_c$ | $a_{c-i}$ | $a_{c-j}$ | X  | y  | z  |
|----------|---------|------------------------|-------|-------|-------|-----------|-----------|----|----|----|
| B        | 1       | $\text{CDCl}_3$        | 170   | 64.3  | 63.7  | 1395      |           | 31 | 81 |    |
| C        | 2       | $\text{CD}_3\text{OD}$ | 170   | 56.2  | 53.4  |           | 777       | 27 | 32 | 49 |

A sharp peak at 1.492 ppm exists in Figure 1B, which belongs to the residual proton from the *t*BA monomer. The amount of the *t*BA monomer mixed in the polymer is around 1.5 which is calculated by comparing the three separated peaks from 6.322 to 5.710 ppm.

We set the area of peak a as 170, which corresponds to the amount of H in  $\text{PEO}_{43}$  ( $43 \times 4 - 2 = 170$ ). The areas of peaks b and c in spectra B and C are listed in Table S1 according to the following equations:

$$\text{B: according to peak b: } x = \frac{64.3 - 2}{170} \times \frac{43 \times 4 - 2}{2} = 31.2 \approx 31$$

$$\text{according to peak c: } x = \frac{63.7}{170} \times \frac{43 \times 4 - 2}{2} = 31.8 \approx 32$$

according to peaks c+d+f+g+i+e+h :

$$y = \frac{1395 - 31 \times (3 + 2 + 2 + 6)}{170} \times \frac{43 \times 4 - 2}{12} - 1.5 = 81.2 \approx 81$$

$$\text{C: according to peak b: } x = \frac{56.2 - 2}{170} \times \frac{43 \times 4 - 2}{2} = 27.1 \approx 27$$

$$\text{according to peak c: } x = \frac{53.4}{170} \times \frac{43 \times 4 - 2}{2} = 26.7 \approx 27$$

according to peaks c+d+j+h+f+g+i+e:

$$y + z = 81$$

$$11y + (2 + 6 + 3) \times 27 + z + 81 = 777.0$$

$$\rightarrow y = 32, z = 49$$

**Fig. S1.** TEM images of PEO<sub>43</sub>-*b*-P(DMA<sub>31</sub>-*stat*-*t*BA<sub>81</sub>) (polymer *I*) vesicles and co-existed micelles at pH 10. The particles were stained by PTA at 1.65 mg/mL. Round circle: vesicles; diamond: micelles.

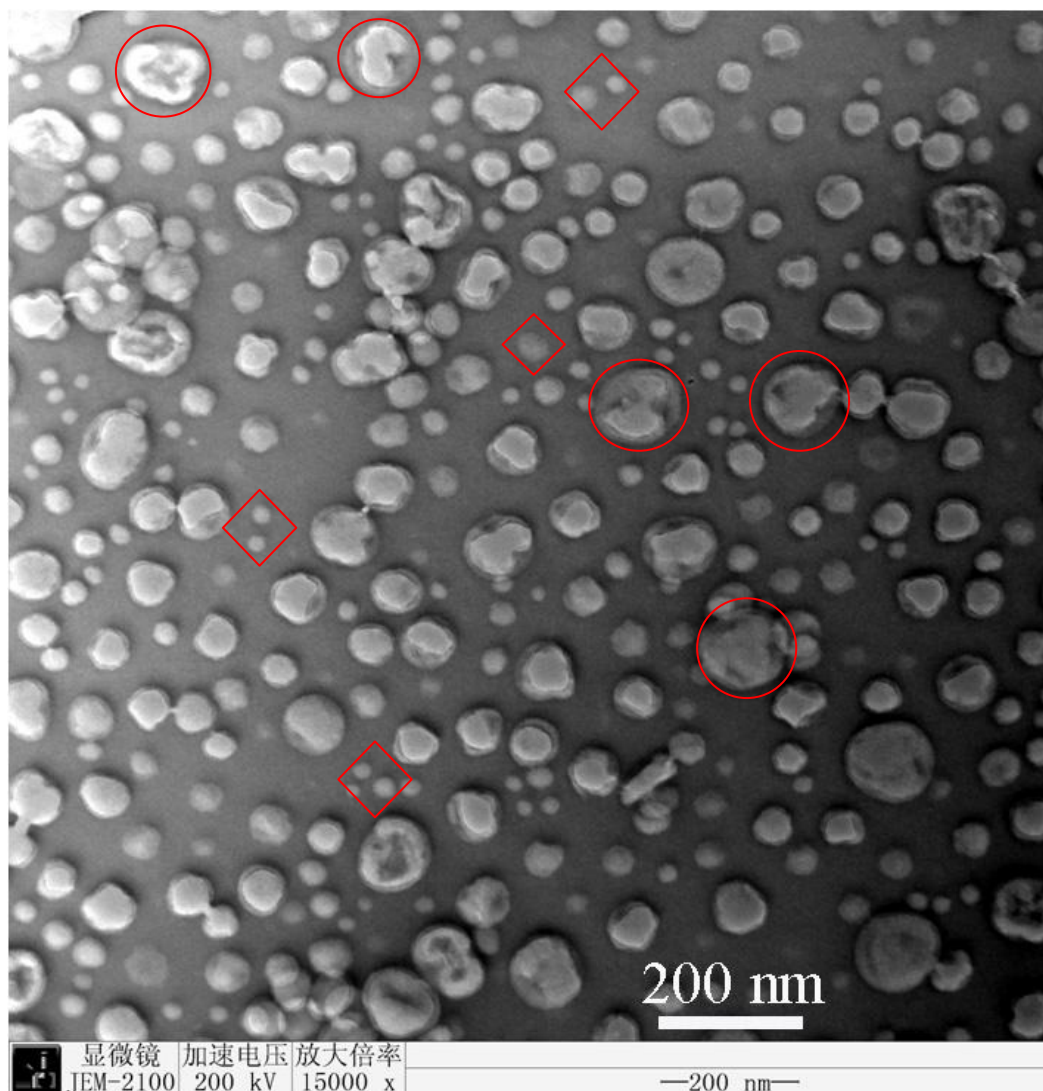

**Fig. S2.** Magnified TEM images of PEO<sub>43</sub>-*b*-P(DMA<sub>31</sub>-*stat*-tBA<sub>81</sub>) copolymer vesicles decorated with silver nanoparticles, clearly indicating the silver nanoparticles (the black dots) in the vesicle membrane. Some small micelles are co-existed.

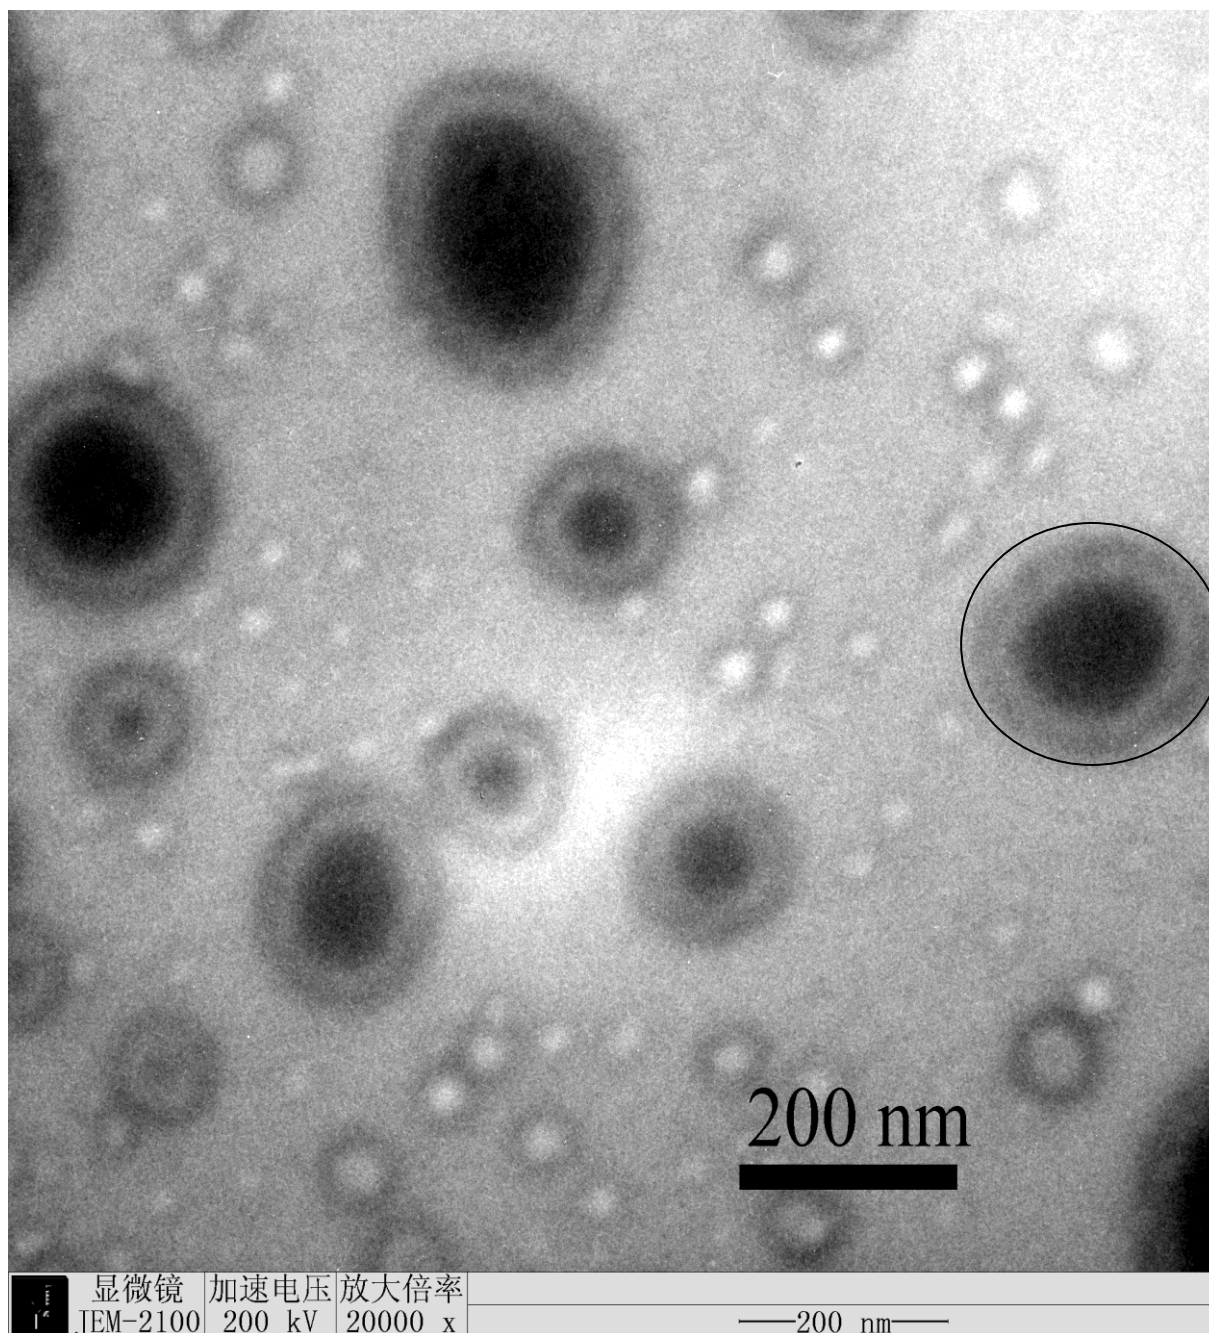



Below is the magnified TEM image of the vesicle circled in the above image. The average diameter of silver nanoparticles (black dots) is 1.9 nm.

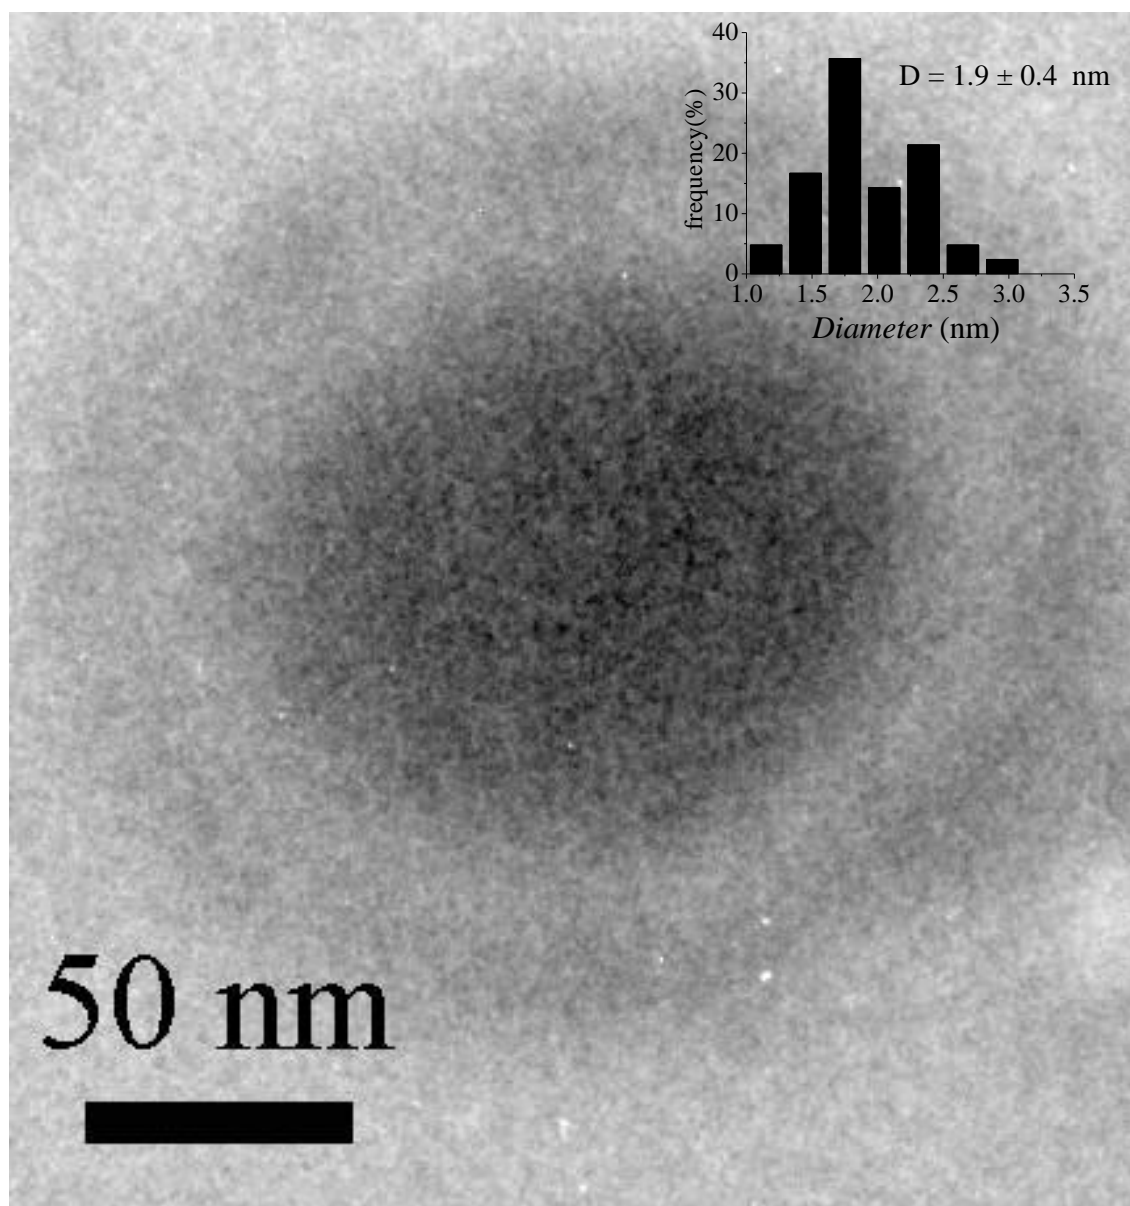

Supplement: c2py20181j.pdf [file c2py20181j.pdf]
